# Supplementary material for: Characterizing spatially restricted rupture in Nankai shallow very low-frequency earthquakes
Source: Research Square preprint supplement (doi:10.21203/rs.3.rs-7074847/v1), 2025-07-18
Supplement: Supplementary file 1 [file 6d1b5d4b9c5f97ebc0f2b183.docx]

*Communications Earth & Environment*

Supporting Information for

**Characterizing spatially restricted rupture in Nankai shallow very low-frequency earthquakes**

Xueting Wei1, Xiaofei Chen2,3 and Wei Liu2

*1 School of Earth and Space Science and Technology, Wuhan University, Wuhan, 430072, China.*

*2 Department of Earth and Space Sciences, Southern University of Science and Technology, Shenzhen, 518055, China.*

*3 Guangdong Provincial Key Laboratory of Geophysical High-resolution Imaging Technology, Southern University of Science and Technology, Shenzhen, 518055, China.*

**Contents of this file**

Figures S1 to S13

Tables S1 to S2


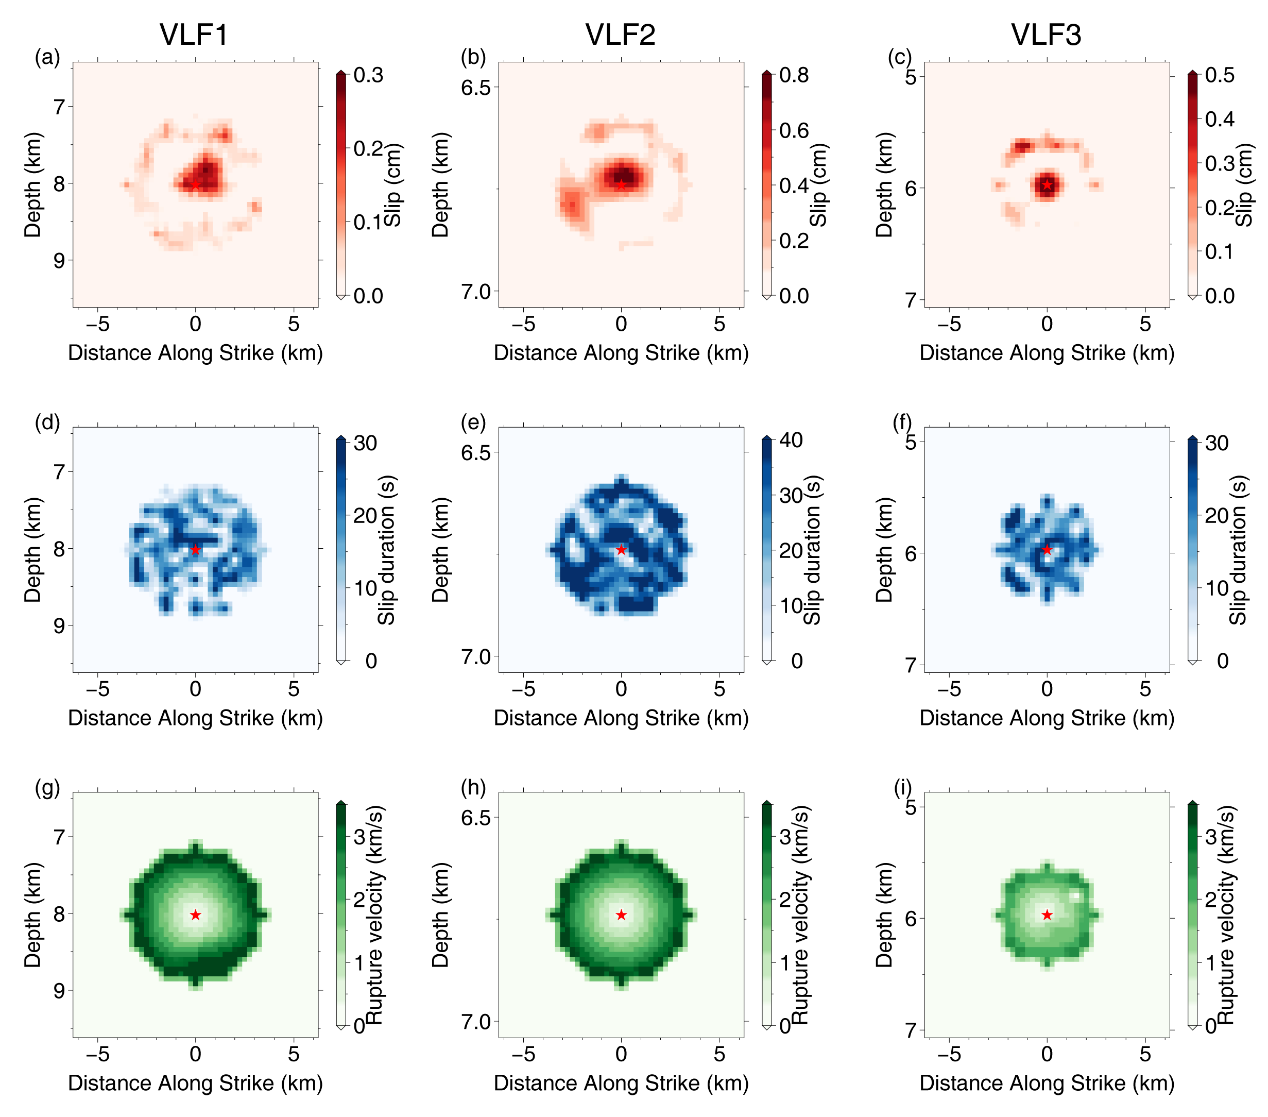


**Figure S1 | Slip, slip duration and rupture velocity distributions of VLF1, VLF2, VLF3.** a–c, Slip distribution; d–f, Duration distribution; g–i, Rupture velocity distribution.


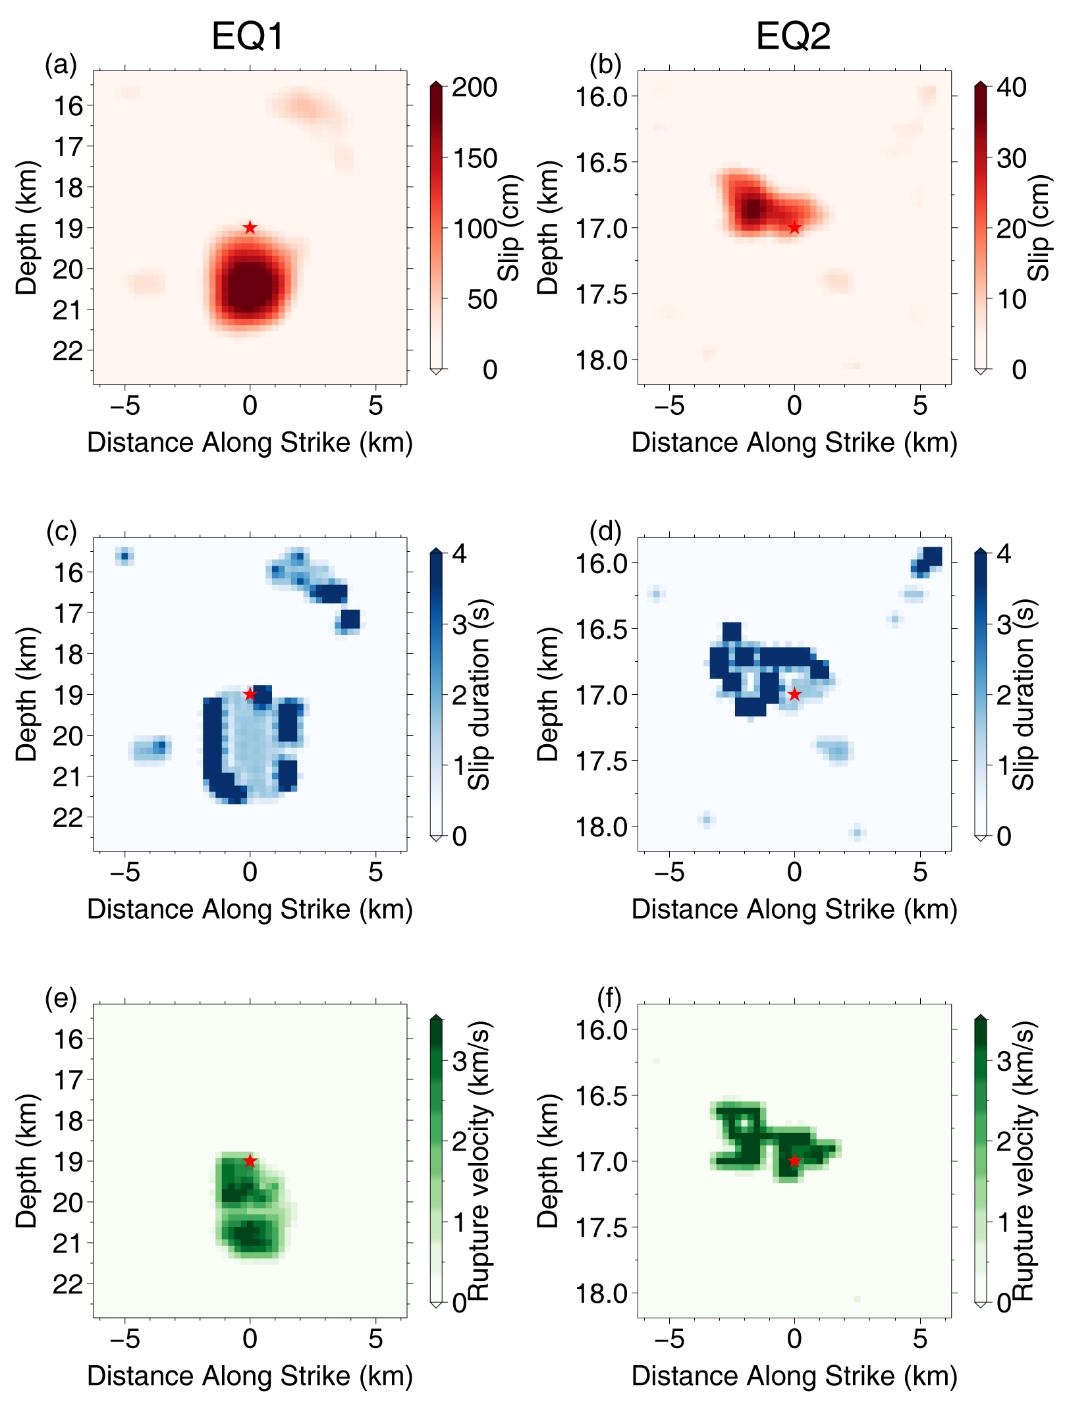


**Figure S2 | Slip, slip duration and rupture velocity distributions of EQ1 and EQ2.** a–b, Slip distribution; c–d, Duration distribution; e–f, Rupture velocity distribution.


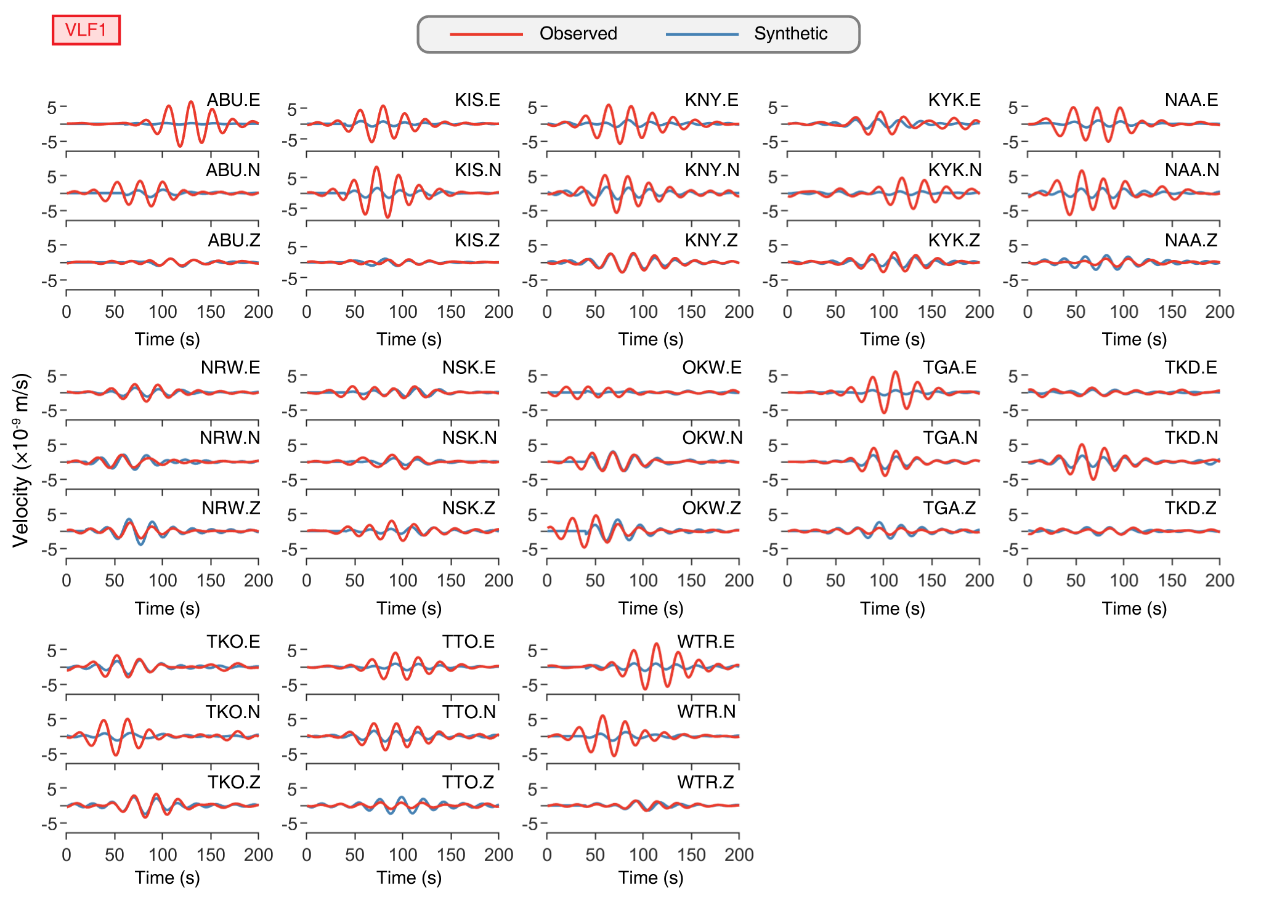


**Figure S3 | Comparison of VLF1 Waveforms.** Comparison between observed (red line) and synthetic (blue line) three-component (E, N, Z) seismograms at the 13 F-net stations used for the finite-fault inversion. Both observed and synthetic velocity waveforms are bandpass-filtered between 0.02 and 0.05 Hz.


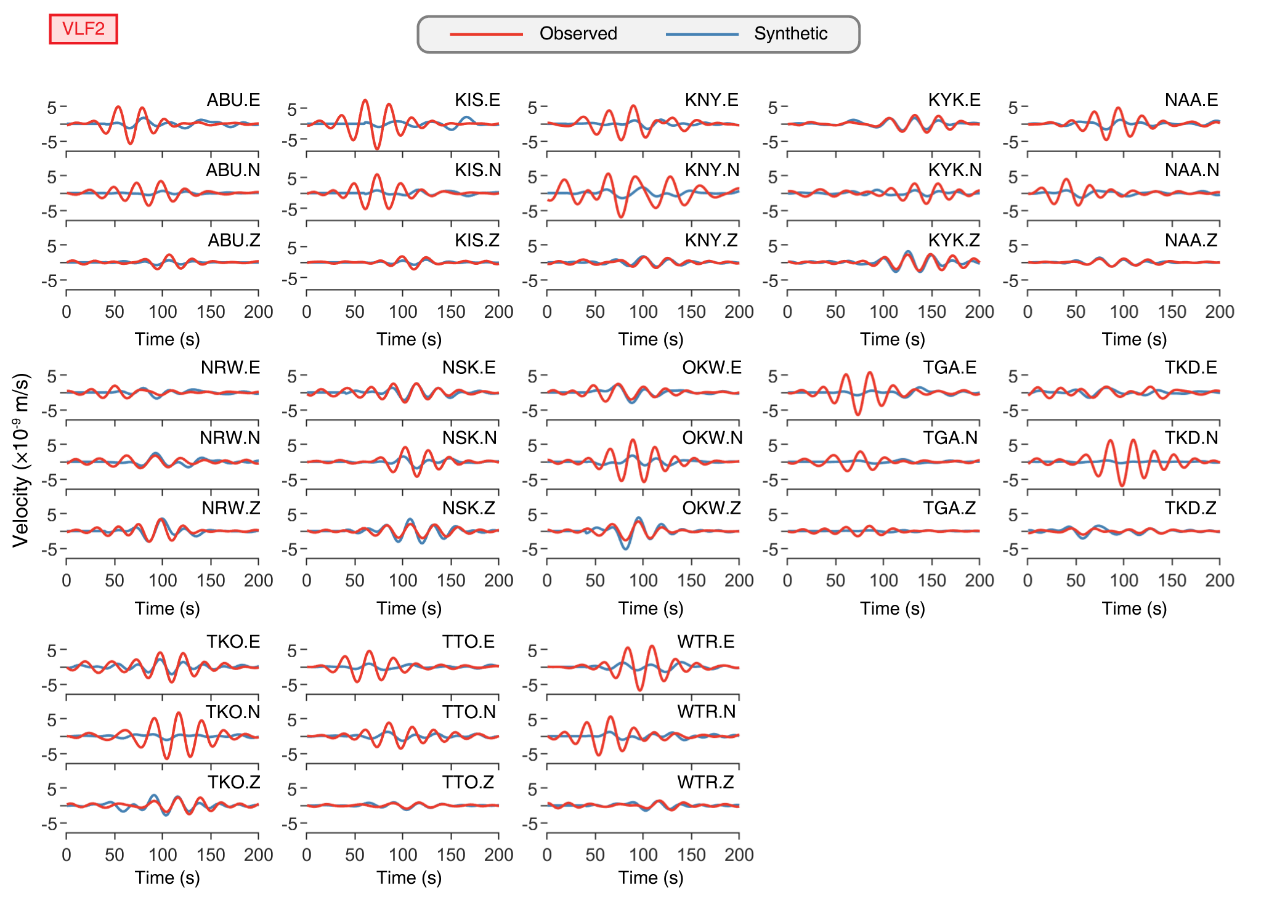


**Figure S4 | Comparison of VLF2 Waveforms.** Comparison between observed (red line) and synthetic (blue line) three-component (E, N, Z) seismograms at the 13 F-net stations used for the finite-fault inversion. Both observed and synthetic velocity waveforms are bandpass-filtered between 0.02 and 0.05 Hz.


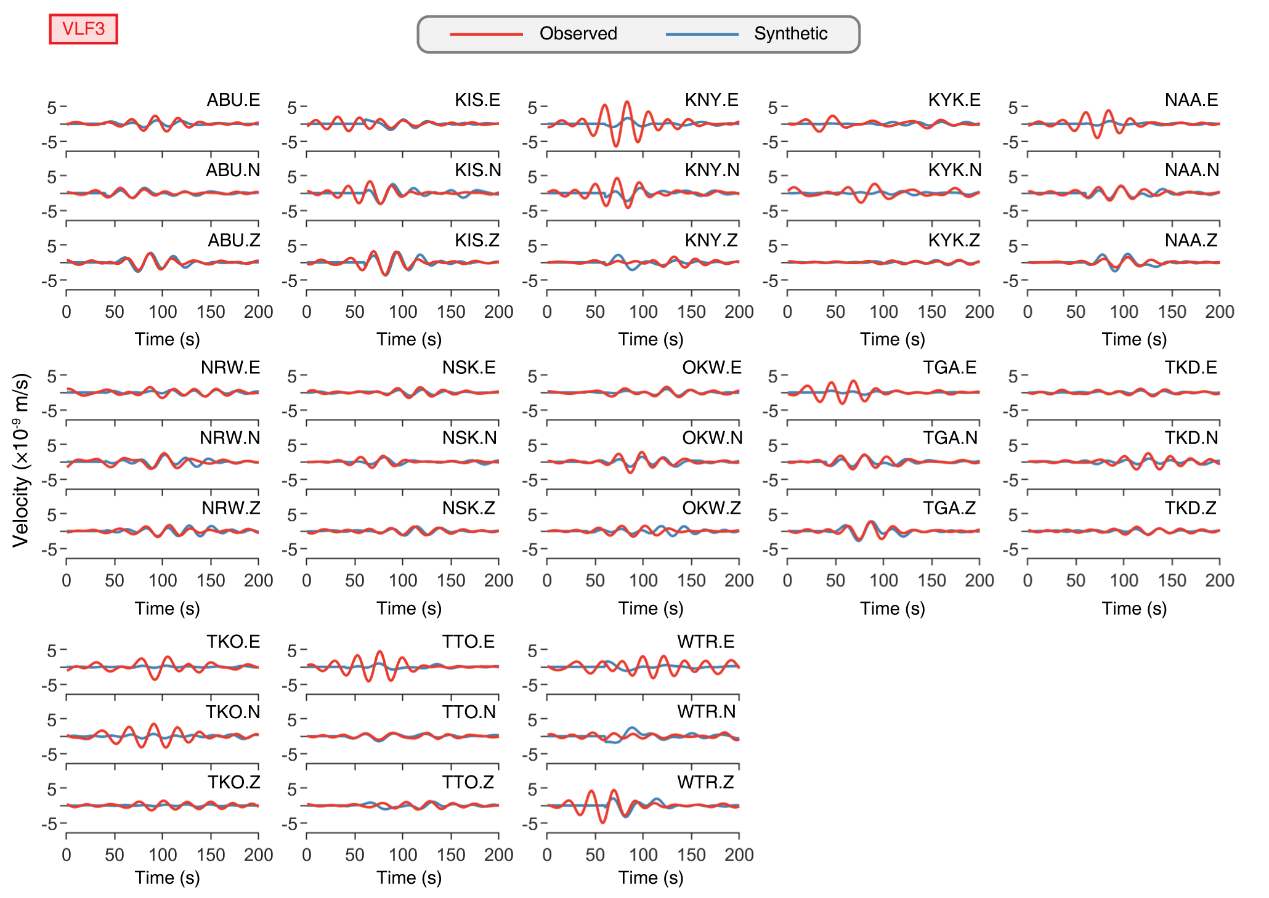


**Figure S5 | Comparison of VLF3 Waveforms.** Comparison between observed (red line) and synthetic (blue line) three-component (E, N, Z) seismograms at the 13 F-net stations used for the finite-fault inversion. Both observed and synthetic velocity waveforms are bandpass-filtered between 0.02 and 0.05 Hz.


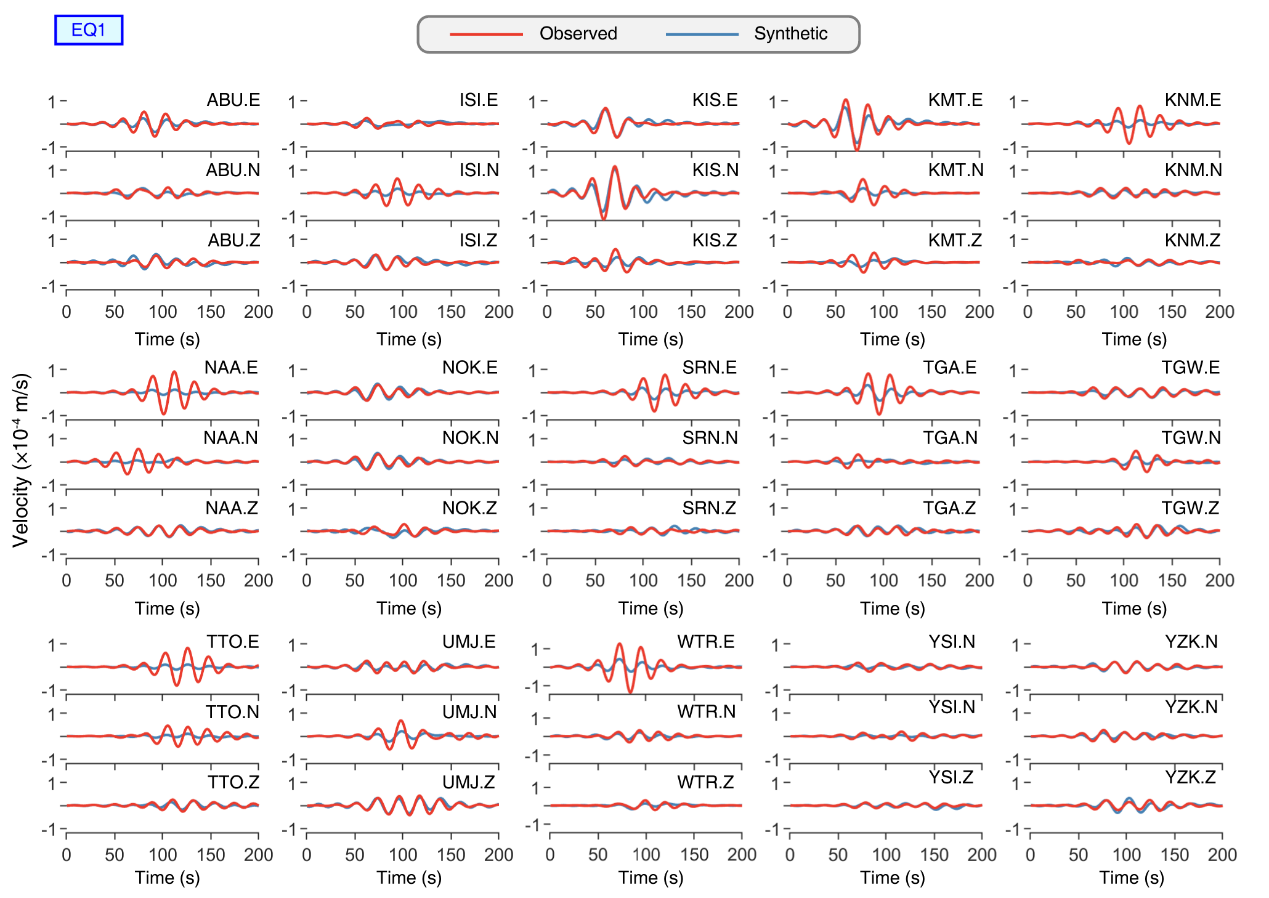


**Figure S6 | Comparison of EQ1 Waveforms.** Comparison between observed (red line) and synthetic (blue line) three-component (E, N, Z) seismograms at the 15 F-net stations used for the finite-fault inversion. Both observed and synthetic velocity waveforms are bandpass-filtered between 0.02 and 0.05 Hz.


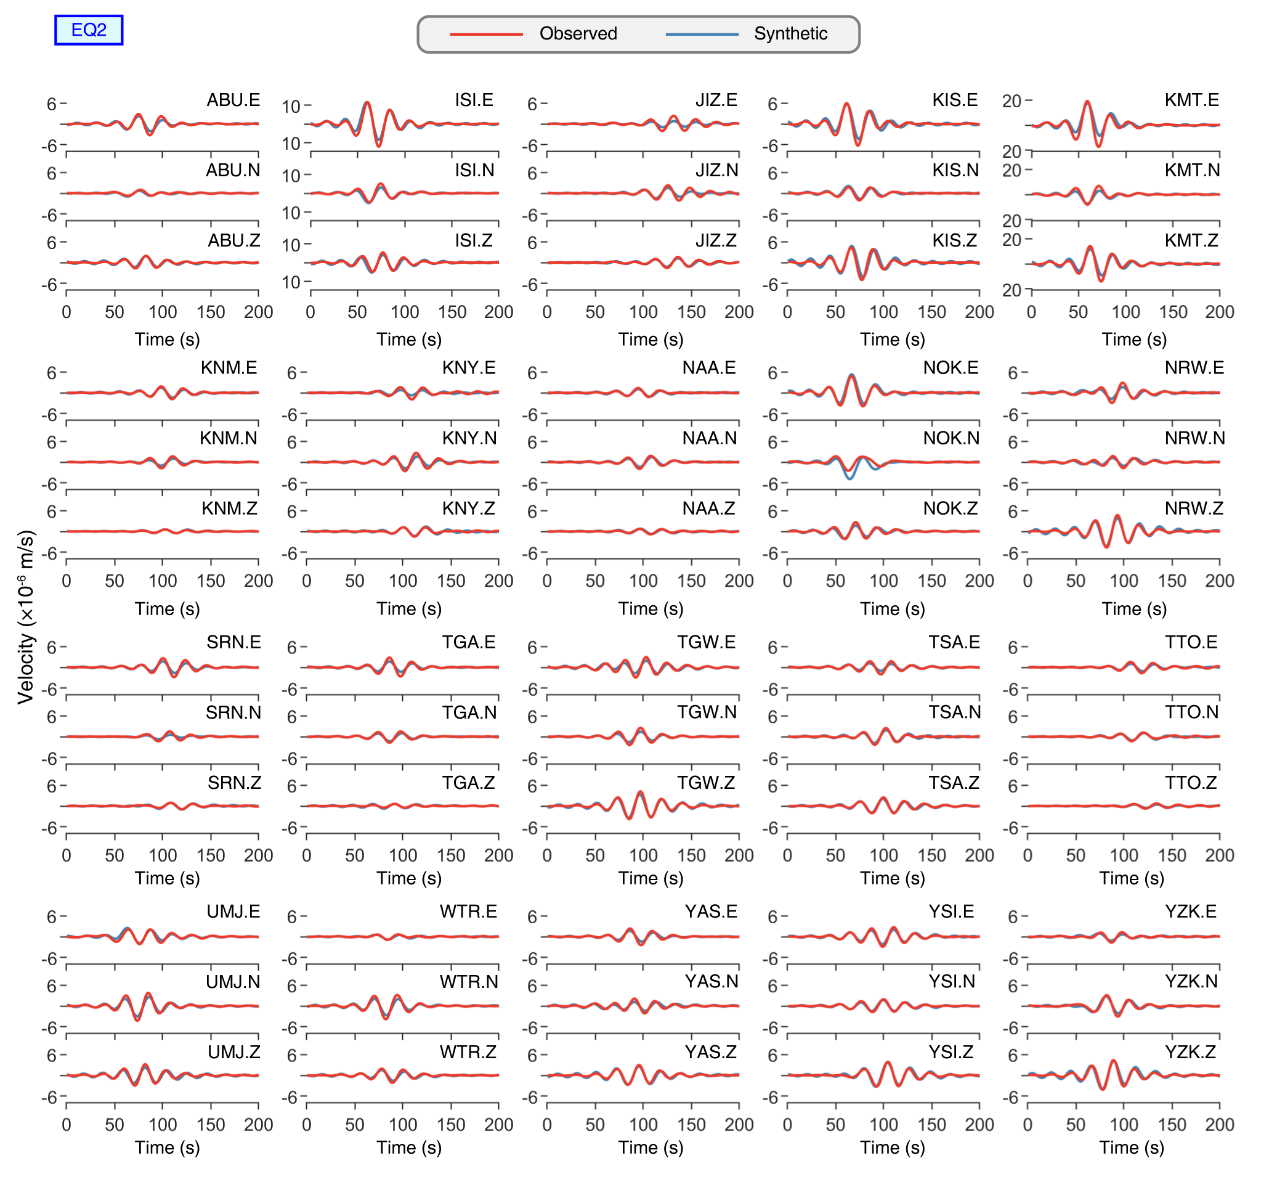


**Figure S7 | Comparison of EQ2 Waveforms.** Comparison between observed (red line) and synthetic (blue line) three-component (E, N, Z) seismograms at the 20 F-net stations used for the finite-fault inversion. Both observed and synthetic velocity waveforms are bandpass-filtered between 0.02 and 0.05 Hz.


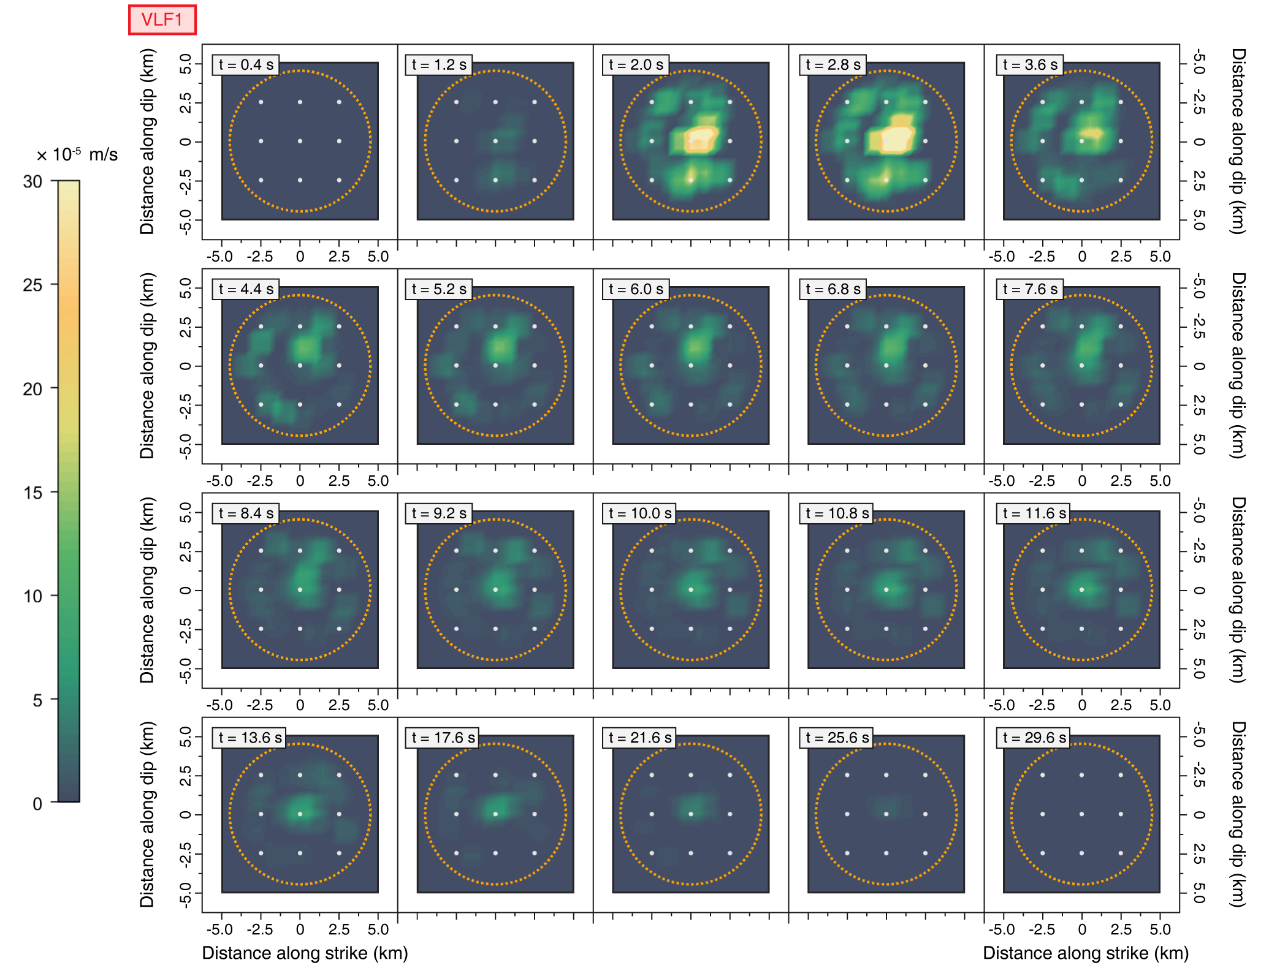


**Figure S8 | Rupture evolution process of VLF1 based on finite fault inversion.** The orange circle represents a 4.5-km radius area centered on the epicenter. Time intervals are indicated in the top-left corner of each panel.


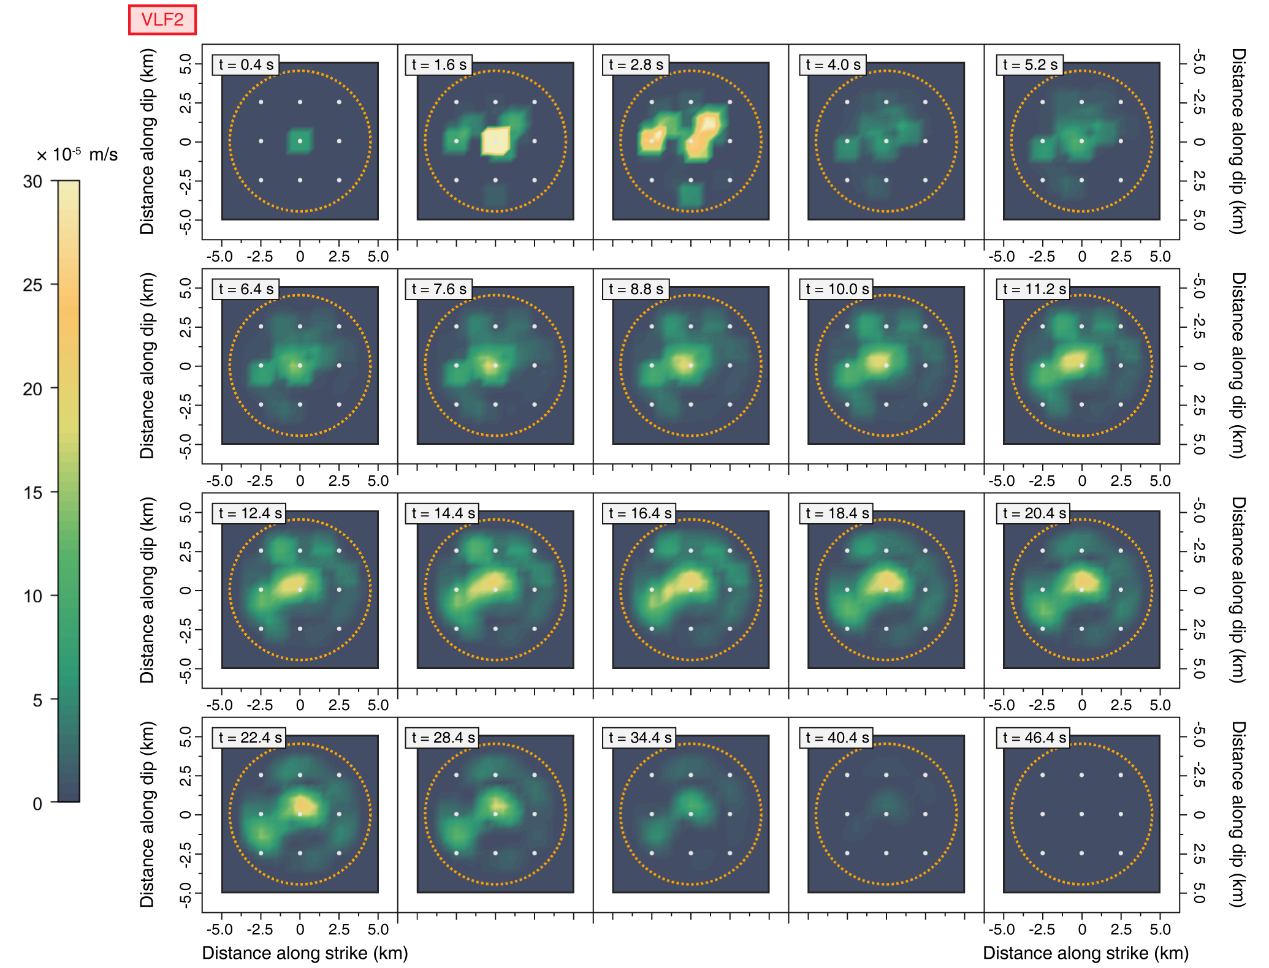


**Figure S9 | Rupture evolution process of VLF2 based on finite fault inversion.** The orange circle represents a 4.5-km radius area centered on the epicenter. Time intervals are indicated in the top-left corner of each panel.


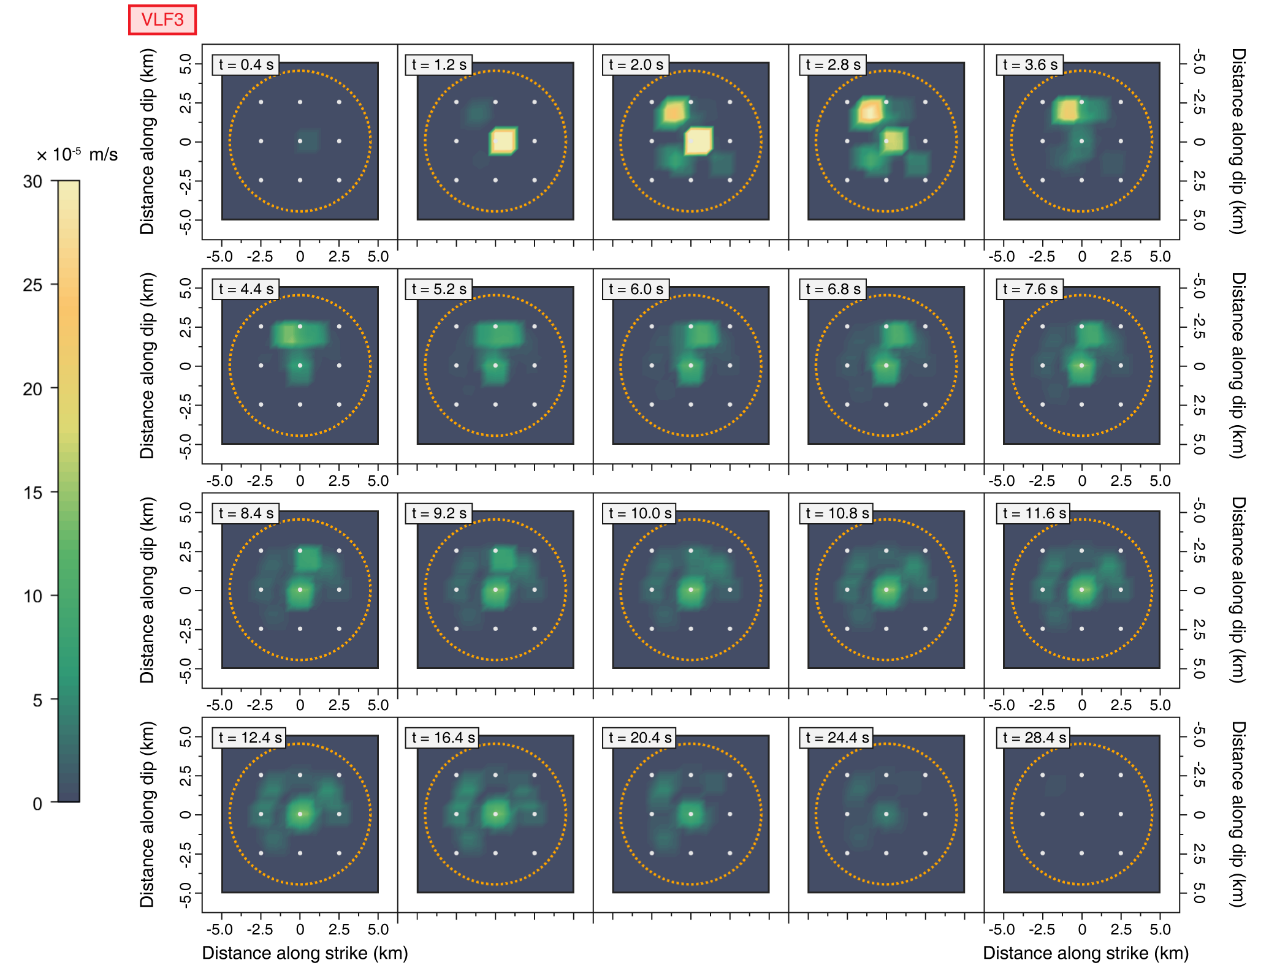


**Figure S10 | Rupture evolution process of VLF3 based on finite fault inversion.** The orange circle represents a 4.5-km radius area centered on the epicenter. Time intervals are indicated in the top-left corner of each panel.


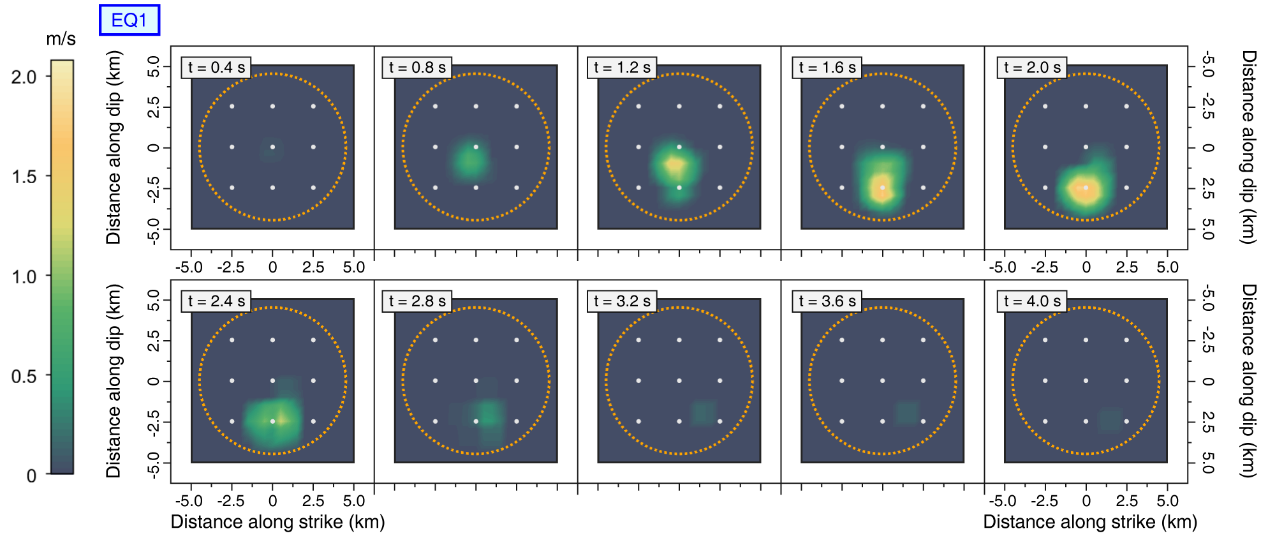


**Figure S11 | Rupture evolution process of EQ1 based on finite fault inversion.** The orange circle represents a 4.5-km radius area centered on the epicenter. Time intervals are indicated in the top-left corner of each panel.


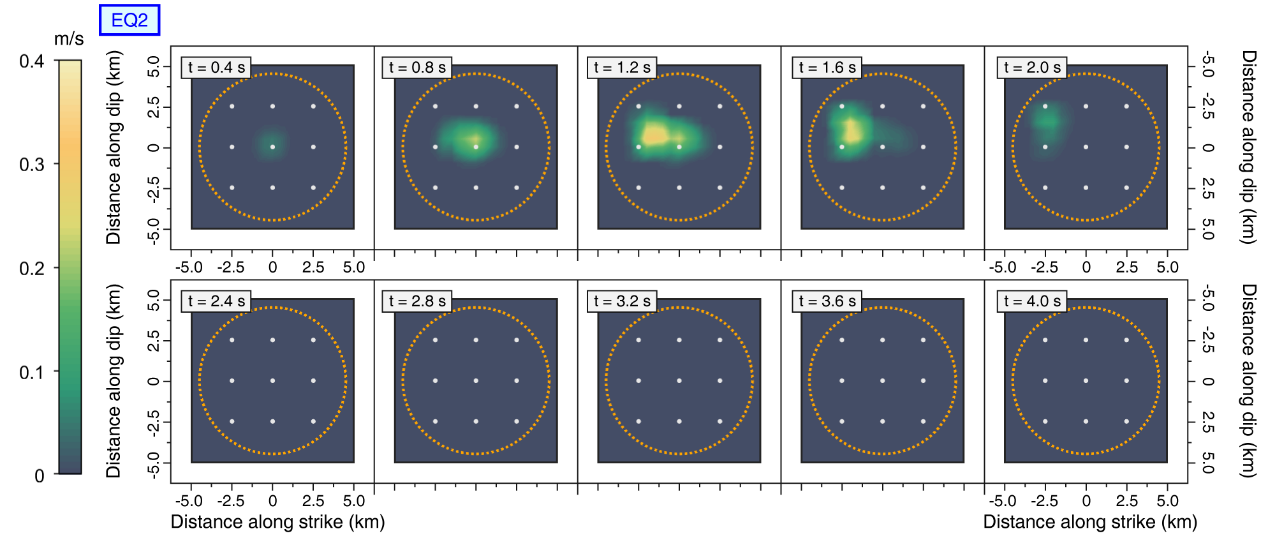


**Figure S12 | Rupture evolution process of EQ2 based on finite fault inversion.** The orange circle represents a 4.5-km radius area centered on the epicenter. Time intervals are indicated in the top-left corner of each panel.


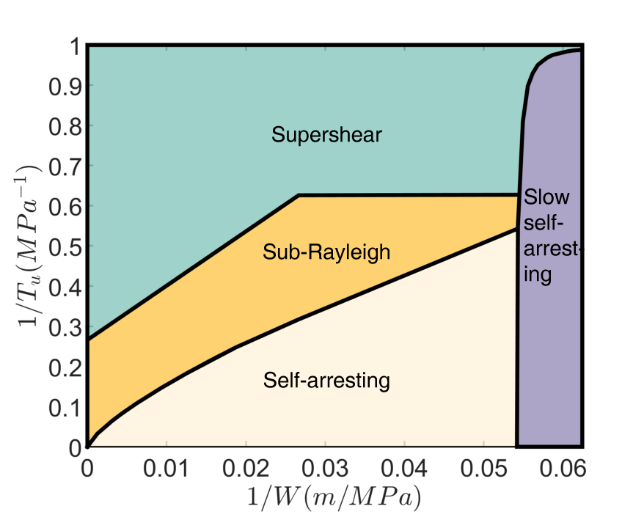


**Figure S13 | Phase diagram of rupture dynamics.** Parameter space for rupture modes under fixed seismic velocities (Vs 3.464 km/s, Vp 6 km/s), density (2670 kg/m³), and the fault initial stress (1 MPa). Axes represent inverse breakdown stress drop (vertical) versus inverse weakening rate (horizontal). Colored domains denote rupture regimes, with slow self-arresting ruptures (SSARs) confined to weakening rates 18.2 MPa/m.

| Model parameters | SSAR | Sub-Rayleigh |
| --- | --- | --- |
| (m/s) | 6000 | 6000 |
| (m/s) | 3464 | 3464 |
| (kg/m3) | 2670 | 2670 |
| (MPa) | 1.00 | 1.00 |
| (MPa) | 0.90 | 0.40 |
| (m) | 0.14 | 0.06 |
|  |  |  |
| (m) | 200 | 200 |
| Nucleation patch diameter (km) | 10 | 10 |
| Unbreakable boundary diameter (km) | 36 | 36 |
| Domain size (grid cells) | 200×200 | 200×200 |

**Table S1 | Model parameters.** , P-wave velocity; , S-wave velocity; , density; , breakdown stress drop; , dynamic stress drop; , critical slip distance;, S-wave quality factor; , P-wave quality factor; , spatial dimension of a grid cell in the computational model.

| Event | Strike | Dip | Subfault size (km) | Grid of subfault |
| --- | --- | --- | --- | --- |
| VLF1 | 284.75 | 14.84 | 0.5×0.5 | 25×25 |
| VLF2 | 193.88 | 2.76 | 0.5×0.5 | 25×25 |
| VLF3 | 253.58 | 10.15 | 0.5×0.5 | 25×25 |
| EQ1 | 215.00 | 38.00 | 0.5×0.5 | 25×25 |
| EQ2 | 223.00 | 11.00 | 0.5×0.5 | 25×25 |

**Table S2 | Finite-fault inversion configuration parameters.**
